# Supplementary material for: Different modification pathways for m1A58 incorporation in yeast elongator and initiator tRNAs
Source: PubMed Central journal article supplement (PMC10602860; doi:10.1093/nar/gkad722), 2023-08-31
Supplement: gkad722_supplemental_file.pdf [file gkad722_supplemental_file.pdf]

# Supplementary Material

## Different modification pathways for m<sup>1</sup>A58 incorporation in yeast elongator and initiator tRNAs

Marcel-Joseph Yared, Yasemin Yoluç, Marjorie Catala, Carine Tisné, Stefanie Kaiser & Pierre Barraud

---

Content:

|                                |            |
|--------------------------------|------------|
| Supplementary Tables S1 to S4  | pages 2-6  |
| Supplementary Figures S1 to S7 | pages 7-13 |
| Supplementary References       | page 14    |

## SUPPLEMENTARY TABLES

Supplementary Table S1 – Yeast and *E. coli* strains used in this study

| Strain                                 | Genotype                                                                                                                                                                                                             | Source     |
|----------------------------------------|----------------------------------------------------------------------------------------------------------------------------------------------------------------------------------------------------------------------|------------|
| BY4741                                 | <i>MATa his3-Δ1 leu2-Δ0 met15-Δ0 ura3-Δ0</i>                                                                                                                                                                         | Euroscarf  |
| BY4741- <i>dus1Δ</i>                   | BY4741, <i>YML080w::kanMX</i>                                                                                                                                                                                        | Euroscarf  |
| BY4741- <i>dus3Δ</i>                   | BY4741, <i>YLR401c::kanMX</i>                                                                                                                                                                                        | Euroscarf  |
| BY4741- <i>pus4Δ</i>                   | BY4741, <i>YNL292w::kanMX</i>                                                                                                                                                                                        | Euroscarf  |
| BY4741- <i>trm1Δ</i>                   | BY4741, <i>YDR120c::kanMX</i>                                                                                                                                                                                        | Euroscarf  |
| BY4741- <i>trm2Δ</i>                   | BY4741, <i>YKR056w::kanMX</i>                                                                                                                                                                                        | Euroscarf  |
| BY4741- <i>trm4Δ</i>                   | BY4741, <i>YBL024w::kanMX</i>                                                                                                                                                                                        | Euroscarf  |
| BY4741- <i>trm8Δ</i>                   | BY4741, <i>YDL201w::kanMX</i>                                                                                                                                                                                        | Euroscarf  |
| BY4741- <i>trm10Δ</i>                  | BY4741, <i>YOL093w::kanMX</i>                                                                                                                                                                                        | Euroscarf  |
| BY4741- <i>trm11Δ</i>                  | BY4741, <i>YOL124c::kanMX</i>                                                                                                                                                                                        | Euroscarf  |
| BY4741- <i>rit1Δ</i>                   | BY4741, <i>YMR283c::kanMX</i>                                                                                                                                                                                        | Euroscarf  |
| c13-ABYS-86                            | <i>MATα ura3Δ5 leu2-3,112 his3 pral-1 prb1-1 prc1-1 cps1-3</i>                                                                                                                                                       | (1)        |
| c13-ABYS-86- <i>trm4Δ</i>              | c13-ABYS-86, <i>YBL024w::kanMX</i>                                                                                                                                                                                   | (2)        |
| BW25113- <i>yggHΔ</i>                  | <i>E. coli</i> K-12 <i>lacI<sup>+</sup>rrnB<sub>T14</sub> ΔlacZ<sub>WJ16</sub> hsdR514 ΔaraBAD<sub>AH33</sub> ΔrhaBAD<sub>LD78</sub> rph-1 Δ(araB-D)567 Δ(rhaD-B)568 ΔlacZ4787(::rrnB-3) hsdR514 rph-1 yggH::kan</i> | (3)        |
| BL21-CodonPlus (DE3)-RIL               | <i>E. coli</i> B F <sup>-</sup> ompT hsdS( <sub>RB</sub> <sup>-</sup> <sub>MB</sub> <sup>-</sup> ) dcm <sup>+</sup> Tet <sup>r</sup> gal λ(DE3) endA Hte [argU ileY leuW Cam <sup>r</sup> ]                          | Agilent    |
| BL21-CodonPlus (DE3)-RIL- <i>yggHΔ</i> | <i>E. coli</i> BL21-CodonPlus(DE3)-RIL <i>yggH::kan</i>                                                                                                                                                              | This study |

## Supplementary Table S2 – List of primers used in this study

Pus4-M1\_EcoRI\_Fwd: CAG-GCG-AAT-TCA-TGA-ATG-GAA-TAT-TTG-CTA-TT  
Pus4-V403\_NotI\_Rev: TAC-AAG-GCG-GCC-GCT-TAC-ACC-TGT-TCG-ATT-TT

Trm2-M1\_EcoRI\_Fwd: GAC-AAA-GAA-TTC-ATG-TAC-GAA-CAG-TTT-GAA-TTT  
Trm2-I639\_NotI\_Rev: TAT-TTT-GCG-GCC-GCA-ATT-AGA-TTC-TCT-TCA-TTA  
Trm2\_BamHI-del\_Fwd: GTT-ATC-TTG-GAC-CCA-CCA-CGC-AAG-GGC-TGT-GAC-GAA-  
TTA-TTC  
Trm2\_BamHI-del\_Rev: TGG-TGG-GTC-CAA-GAT-AAC-GGA-AGT-GTT-TTC-ACT-TGG-  
AGT-ATC-AAT-AG  
Trm2-V116\_BamHI\_Fwd: CGA-TGG-ATC-CGT-TGA-AAC-AAC-TTC-TCC-GAT-GG  
Trm2-I639\_XhoI\_Rev: GCG-CCT-CGA-GTT-AGA-TTC-TCT-TCA-TTA-TAC-ACA-C

Trm6-M1\_BamHI\_Fwd: AAT-TTA-GGA-TCC-GAT-GAA-TGC-TTT-GAC-AAC  
Trm6-I478\_NotI\_Rev: CTC-TGC-GGC-CGC-TTA-TAT-CTT-TTG-TTT-CTT-AG  
Trm61-M1\_NdeI\_Fwd: TTT-ACA-TAT-GTC-AAC-AAA-TTG-TTT-TTC-CGG-TTA  
Trm61-K383\_XhoI\_Rev: TAA-TCC-TCG-AGT-TAT-TTT-TCC-GTG-GAT-CGA-AGA

yggH\_A: GGT-GCG-TAC-CTC-ATC-CAG-TT  
yggH\_B: GTA-TCG-TTC-AGG-TGC-CGT-TT  
yggH\_C: CTG-CTC-AGG-GCG-ATC-TTT-AG  
yggH\_D: CGC-CAT-AAA-GCG-TTC-AAA-AT

k1: CAG-TCA-TAG-CCG-AAT-AGC-CT  
k2: CGG-TGC-CCT-GAA-TGA-ACT-GC

rit1\_C: TCT-AGG-AAA-AGT-GAG-TTC-AGG-CTT-A  
rit1\_D: TCG-TGT-AAA-ACC-TCA-GAA-CAC-TGT-A

dus3\_C: GGT-CTA-GGC-AAC-AAA-GGT-ACA-CTA-A  
dus3\_D: TAT-TTT-GAT-TTT-CTT-GGA-ACC-CAT-A

trm10\_C: TAC-CAA-TTA-TGA-AAA-CTG-GAA-CCA-T  
trm10\_D: TAC-AAC-ATC-AAA-GCA-AAA-TAA-GCA-A

kanC: TGA-TTT-TGA-TGA-CGA-GCG-TAA-T

T7 promoter: 5'TAA-TAC-GAC-TCA-CTA-TAG 3'

yeast tRNA<sup>Phe</sup>-WT DNA template :  
3' ATTATGCTGAGTGATATCGCCTAAATCGAGTCAACCTCTCGCGGTCTGACTTCTAGACCTCCAG  
GACACAAGCTAGGTGTCTTAAGCGTGGT 5'  
yeast tRNA<sup>Phe</sup>-ΔU17 DNA template:  
3' ATTATGCTGAGTGATATCGCCTAAATCGAGTCAACCTCTCGCGGTCTGACTTCTAGACCTCCAG  
ACACAAGCTAGGTGTCTTAAGCGTGGT 5'  
yeast tRNA<sup>Phe</sup>-A20A60 DNA template:  
3' ATTATGCTGAGTGATATCGCCTAAATCGAGTCAACCTCTCGCGGTCTGACTTCTAGACCTCCAG  
GACACAAGCTATGTGTCTTAAGCGTGGT 5'  
yeast tRNA<sup>Phe</sup>-A54 DNA template:  
3' ATTATGCTGAGTGATATCGCCTAAATCGAGTCAACCTCTCGCGGTCTGACTTCTAGACCTCCAG  
GACTAGCTAGGTGTCTTAAGCGTGGT 5'  
yeast tRNA<sup>Phe</sup>-UAAA DNA template:  
3' ATTATGCTGAGTGATATCGCCTAAATCGAGTCAACCTCTCGCGGTCTGACTTCTAGACCTCCAG  
ACACTAGCTATGTGTCTTAAGCGTGGT 5'

yeast tRNA<sub>i</sub><sup>Met</sup>-WT DNA template:

3' ATTATGCTGAGTGATATCCGCGGCACCGCGTCACCTTCGCGCGTCCCGAGTATTGGGACTACAGG  
AGCCTAGCTTTGGCTCGCCGCGGTGGT 5'

yeast tRNA<sub>i</sub><sup>Met</sup>-U17 DNA template:

3' ATTATGCTGAGTGATATCCGCGGCACCGCGTCAACCTTCGCGCGTCCCGAGTATTGGGACTACAG  
GAGCCTAGCTTTGGCTCGCCGCGGTGGT 5'

yeast tRNA<sub>i</sub><sup>Met</sup>-G20C60 DNA template:

3' ATTATGCTGAGTGATATCCGCGGCACCGCGTCACCTTCGCGCGTCCCGAGTATTGGGACTACAGG  
AGCCTAGCTTGGGCTCGCCGCGGTGGT 5'

yeast tRNA<sub>i</sub><sup>Met</sup>-U54 DNA template:

3' ATTATGCTGAGTGATATCCGCGGCACCGCGTCACCTTCGCGCGTCCCGAGTATTGGGACTACAGG  
AGCCAAGCTTTGGCTCGCCGCGGTGGT 5'

yeast tRNA<sub>i</sub><sup>Met</sup>-UGCU DNA template:

3' ATTATGCTGAGTGATATCCGCGGCACCGCGTCAACCTTCGCGCGTCCCGAGTATTGGGACTACAG  
GAGCCAAGCTTGGGCTCGCCGCGGTGGT 5'

*Remark: The A1-U72 base pair was replaced with a G1-C72 base pair to improve in vitro transcription efficiency for all tRNA<sub>i</sub><sup>Met</sup> variants.*

reverse complementary oligo for yeast tRNA<sub>i</sub><sup>Met</sup> purification:

5' [Biotin]-AAA-TCG-GTT-TCG-ATC-CGA-GGA-CAT-CAG-GGT-TAT-GA 3'

**Supplementary Table S3 – Purification conditions of the modification enzymes used in this study**

|                                     | <b>Pus4</b>                                                                             | <b>Trm2</b>                                                                                      | <b>Trm6/Trm61</b>                                                                     | <b>Trm4</b>                                                                     |
|-------------------------------------|-----------------------------------------------------------------------------------------|--------------------------------------------------------------------------------------------------|---------------------------------------------------------------------------------------|---------------------------------------------------------------------------------|
| Cooled down at                      | 30°C                                                                                    | 25°C                                                                                             | 18°C                                                                                  | 30°C                                                                            |
| IPTG induction concentration        | 0.5 mM                                                                                  | 0.5 mM                                                                                           | 0.4 mM                                                                                | 0.5 mM                                                                          |
| Growing time after induction        | 6 h                                                                                     | 6 h                                                                                              | 22 h                                                                                  | 17 h                                                                            |
| Lysis Buffer                        | 50 mM Tris-HCl pH 8.0, 300 mM NaCl, 10 mM BME, 1 mM PMSF, 10% (v/v) glycerol, 1 mM EDTA | 50 mM Tris-HCl pH 8.0, 1 M NaCl, 5 mM MgCl <sub>2</sub> , 1 mM DTT, 5% (v/v) glycerol, 1 mM EDTA | 50 mM Tris-HCl pH 8.0, 300 mM NaCl, 1 mM PMSF, 1 mM DTT, 5% (v/v) glycerol, 1 mM EDTA | 50 mM Tris-HCl pH 8.0, 0.5 M NaCl, 1 mM DTT, 0.1% (v/v) Triton X-100, 1 mM EDTA |
| Purification steps                  | -HisTrap HP<br>-Superdex 75                                                             | -HisTrap HP<br>-HiPrep Phenyl HP<br>-Superdex 75                                                 | -HisTrap HP<br>-Superdex 200                                                          | -HisTrap HP<br>-Superdex 200                                                    |
| Storage Buffer                      | 50 mM Tris-HCl pH 8.0, 150 mM NaCl, 2 mM BME                                            | 50 mM Tris-HCl pH 8.0, 400 mM NaCl, 1 mM DTT                                                     | 50 mM Tris-HCl pH 8.0, 300 mM NaCl, 5 mM DTT                                          | 50 mM Tris-HCl pH 8.0, 300 mM NaCl, 1 mM DTT, 5% (v/v) glycerol                 |
| Concentration                       | to ~10 mg/mL with Amicon 10,000 MWCO                                                    | to ~5 mg/mL with Amicon 50,000 MWCO                                                              | to ~5 mg/mL with Amicon 50,000 MWCO                                                   | to ~8 mg/mL with Amicon 50,000 MWCO                                             |
| mM extinction coefficient           | 30.4 mM <sup>-1</sup> .cm <sup>-1</sup>                                                 | 30.8 mM <sup>-1</sup> .cm <sup>-1</sup>                                                          | 89 mM <sup>-1</sup> .cm <sup>-1</sup>                                                 | 80.9 mM <sup>-1</sup> .cm <sup>-1</sup>                                         |
| Vector                              | pET28-Pus4                                                                              | pSUMO-Trm2                                                                                       | pETDuet-Trm6/Trm61                                                                    | pET28-Trm4                                                                      |
| Expression strain                   | <i>E. coli</i> BL21(DE3) CodonPlus-RIL                                                  | <i>E. coli</i> BL21(DE3) CodonPlus-RIL                                                           | <i>E. coli</i> BL21(DE3) CodonPlus-RIL <i>yggH::kan</i>                               | <i>E. coli</i> BL21(DE3) CodonPlus-RIL                                          |
| Purification adapted from reference | (4)                                                                                     | -                                                                                                | -                                                                                     | (5)                                                                             |

IPTG: isopropyl-β-D-thiogalactopyranoside; BME : 2-mercaptoethanol; PMSF: phenylmethanesulfonyl fluoride; EDTA: ethylenediaminetetraacetic acid; DTT: dithiothreitol

**Supplementary Table S4**

| Enzyme                       | Trm2                             |                         | Trm6/Trm61                       |                         |                         |                             |                                             |                                                        |
|------------------------------|----------------------------------|-------------------------|----------------------------------|-------------------------|-------------------------|-----------------------------|---------------------------------------------|--------------------------------------------------------|
| tRNA quantity                | 500 pmol                         |                         | 500 pmol                         |                         |                         |                             |                                             |                                                        |
| Yeast tRNAs                  | unmodified - tRNA <sup>Phe</sup> | Ψ55-tRNA <sup>Phe</sup> | unmodified - tRNA <sup>Phe</sup> | T54-tRNA <sup>Phe</sup> | Ψ55-tRNA <sup>Phe</sup> | Ψ55-T54-tRNA <sup>Phe</sup> | unmodified-tRNA <sub>i</sub> <sup>Met</sup> | m <sup>5</sup> C48,49-tRNA <sub>i</sub> <sup>Met</sup> |
| Enzyme (pmol)                | 20                               | 2.5                     | 15                               | 15                      | 5                       | 2.5                         | 7.5                                         | 7.5                                                    |
| SAM (pmol)                   | 880                              | 880                     | 880                              | 880                     | 880                     | 880                         | 880                                         | 880                                                    |
| [ <sup>3</sup> H]-SAM (pmol) | 2.5                              | 2.5                     | 2.5                              | 2.5                     | 2.5                     | 2.5                         | 2.5                                         | 2.5                                                    |
| Reaction conditions          | MB1X<br>30°C<br>30 min           | MB1X<br>30°C<br>30 min  | MB1X<br>30°C<br>96 min           | MB1X<br>30°C<br>30 min  | MB1X<br>30°C<br>30 min  | MB1X<br>30°C<br>30 min      | MB1X<br>30°C<br>30 min                      | MB1X<br>30°C<br>30 min                                 |

The different kinetic reaction mixes and conditions to determine the initial velocities of Trm2 introducing the T54 modification and Trm6/Trm61 introducing the m<sup>1</sup>A58 modification to a set of specifically modified yeast tRNAs. MB corresponds the maturation buffer: 100 mM NaH<sub>2</sub>PO<sub>4</sub>/K<sub>2</sub>HPO<sub>4</sub> pH 7.0, 5 mM NH<sub>4</sub>Cl, 2 mM DTT and 0.1 mM EDTA. These quantities correspond to a volume of 50 μL of reaction.

## SUPPLEMENTARY FIGURES

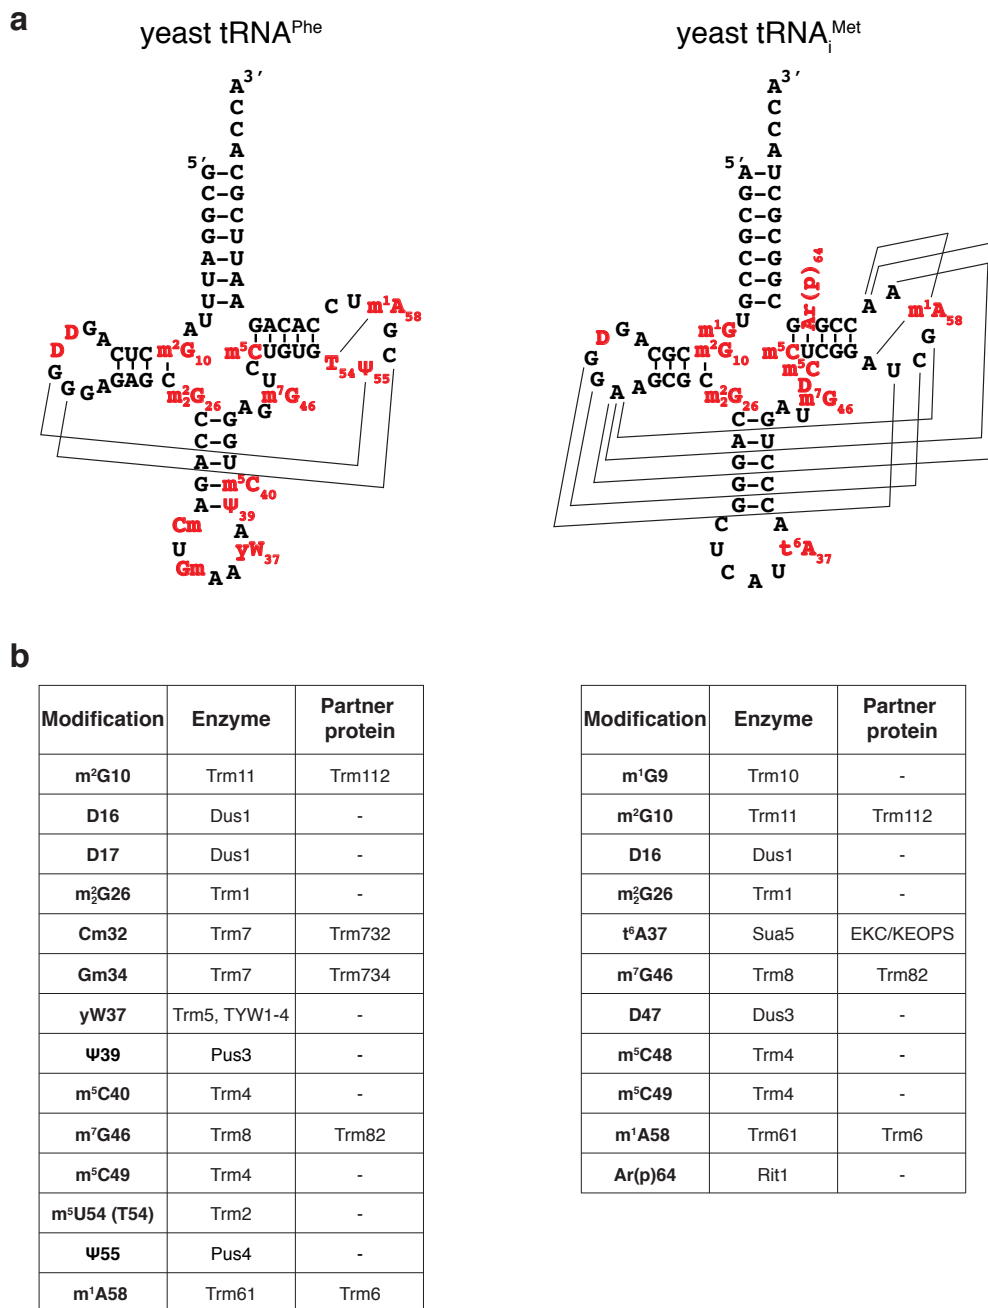

### Supplementary Figure S1: Sequence and modifications of yeast elongator tRNA<sup>Phe</sup> and yeast initiator tRNA<sub>i</sub><sup>Met</sup>

(a) Sequence and cloverleaf representation of yeast tRNA<sup>Phe</sup> (*left*) and yeast tRNA<sub>i</sub><sup>Met</sup> (*right*). Main tertiary interaction between the D- and T-loops are represented with thin lines. Modifications are highlighted in red. (b) Table of correspondence between the modifications and the enzyme responsible for their introduction in yeast tRNA<sup>Phe</sup> (*left*) and in yeast tRNA<sub>i</sub><sup>Met</sup> (*right*).

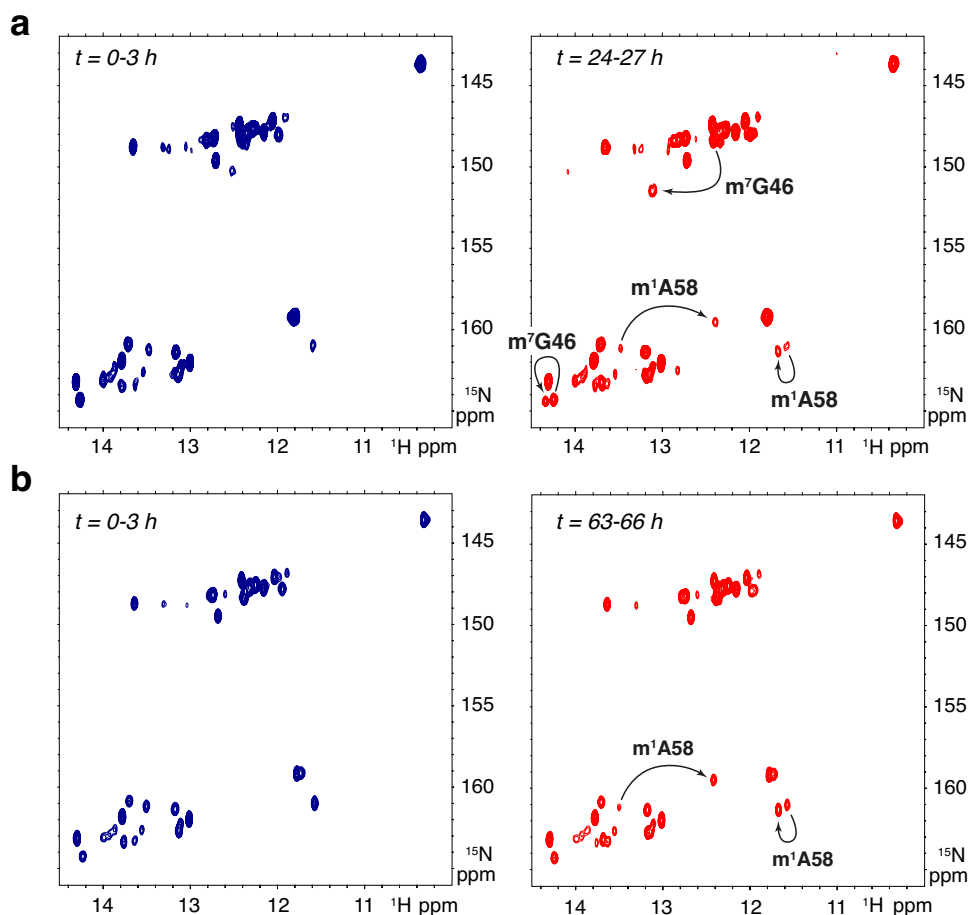

### Supplementary Figure S2: Contamination of Trm6/Trm61 with $m^7G46$ activity

(a) ( $^1H, ^{15}N$ )-BEST-TROSY experiments on  $^{15}N$ -labelled tRNA<sup>Phe</sup> reporting on Trm6/Trm61 enzymatic activity purified from *E. coli* BL21(DE3)CodonPlus-RIL cells. Concentrations: tRNA<sup>Phe</sup> at 100  $\mu$ M and Trm6/Trm61 at 2  $\mu$ M. Although the  $m^1A58$  activity is clearly observable, the Trm6/Trm61 sample is contaminated with  $m^7G46$  activity. (b) ( $^1H, ^{15}N$ )-BEST-TROSY experiments on  $^{15}N$ -labelled tRNA<sup>Phe</sup> reporting on Trm6/Trm61 enzymatic activity purified from *E. coli* BL21(DE3)CodonPlus-RIL *yggh::kan* cells. The sample is no longer contaminated with  $m^7G46$  activity.



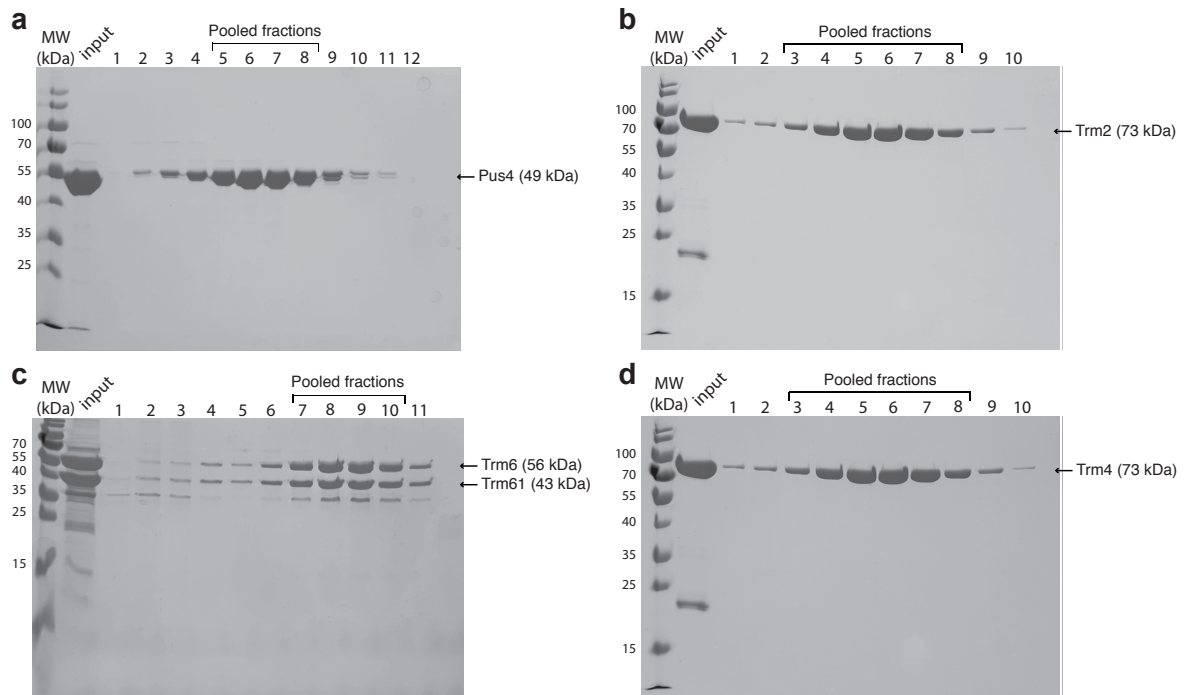

**Supplementary Figure S3: Quality control in the last step of purification of the modification enzymes**

(a) SDS-PAGE of the fractions of the Superdex 75 size exclusion column of Pus4 purification. (b) SDS-PAGE of the fractions of the Superdex 200 size exclusion column of Trm2 purification. (c) SDS-PAGE of the fractions of the Superdex 200 size exclusion column of Trm6/Trm61 purification. (d) SDS-PAGE of the fractions of the Superdex 200 size exclusion column of Trm4 purification. (MW): protein ladder, size in kDa. (input): fraction injected onto the column. For each purification, the pooled fractions are indicated above the gel.

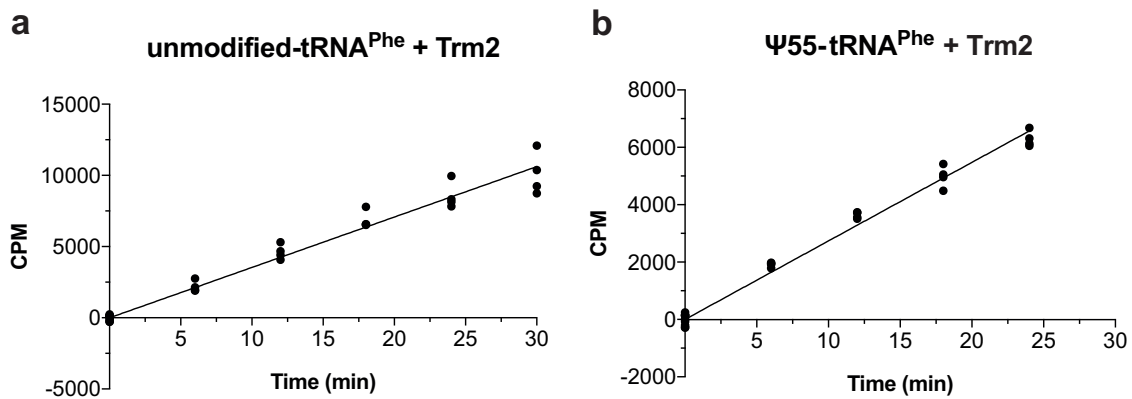

**Supplementary Figure S4: Kinetic efficiency of Trm2 depending on the modification profiles of yeast tRNA<sup>Phe</sup>**

(a) Raw counts per minute (CPM) data corresponding to T54 introduction by Trm2 on the yeast unmodified-tRNA<sup>Phe</sup>. (b) Raw CPM data corresponding to T54 introduction by Trm2 on the yeast tRNA<sup>Phe</sup> containing the Ψ55 modification (Ψ55-tRNA<sup>Phe</sup>). CPM are measured for 4 or 5 time points in four independent experiments (N=4). Black dots represent individual measurements.

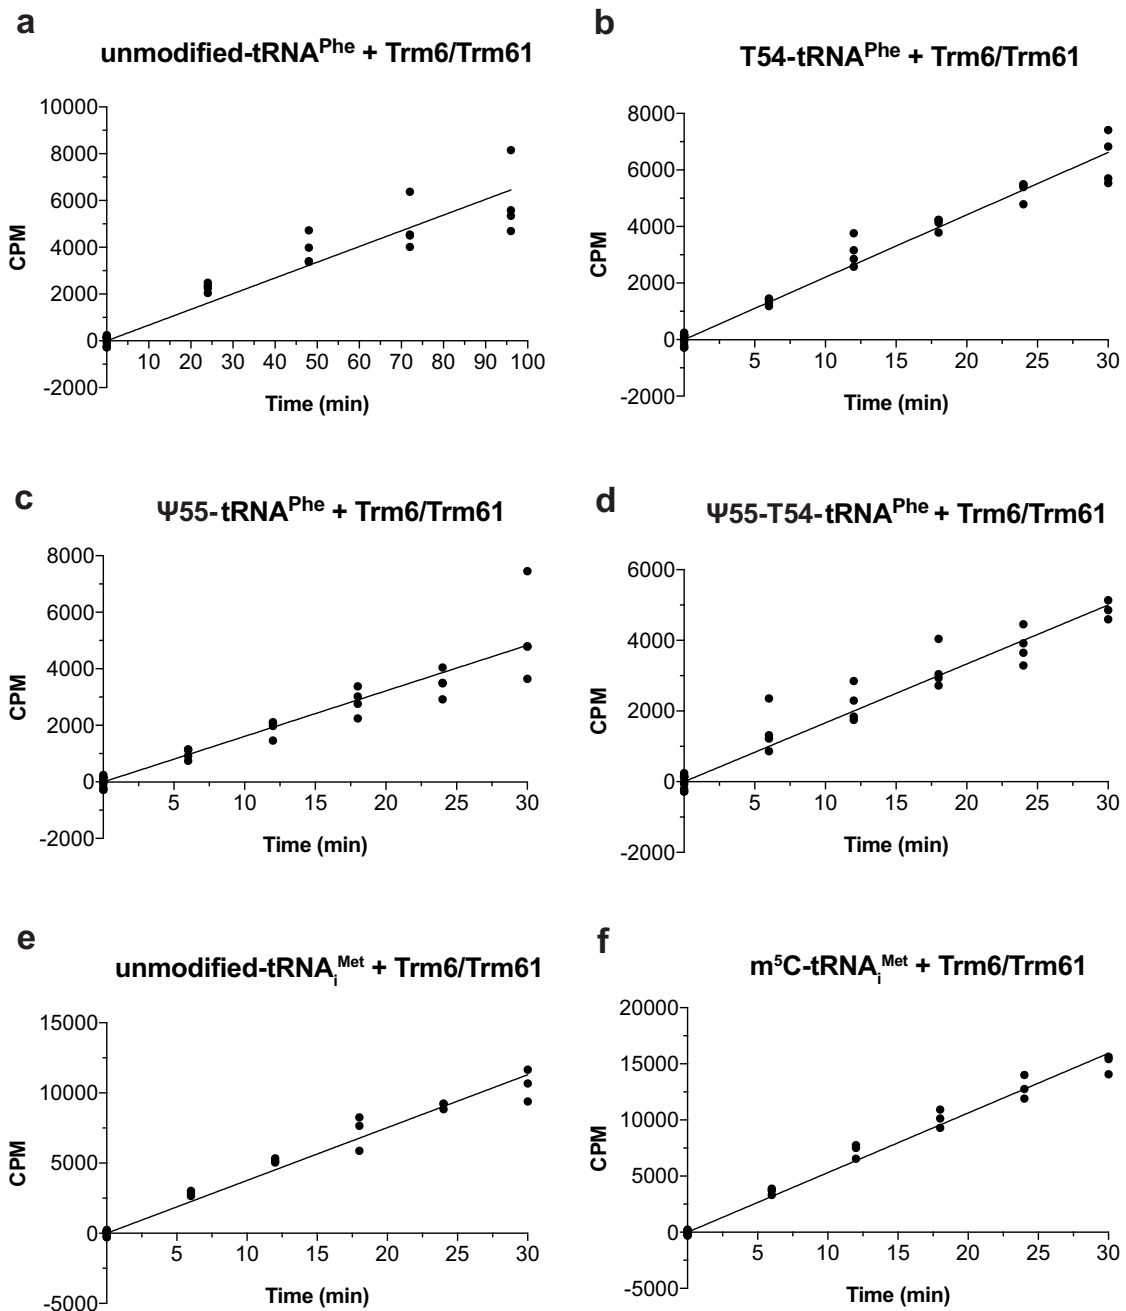

**Supplementary Figure S5: Kinetic efficiency of Trm6/Trm61 depending on the modification profiles of yeast tRNA<sup>Phe</sup> and tRNA<sub>i</sub><sup>Met</sup>.**

(a) Raw counts per minute (CPM) data corresponding to the m<sup>1</sup>A58 introduction by Trm6/Trm61 on the yeast unmodified-tRNA<sup>Phe</sup>. (b) Raw CPM data corresponding to the m<sup>1</sup>A58 introduction by Trm6/Trm61 on the tRNA<sup>Phe</sup> containing the T54 modification (T54-tRNA<sup>Phe</sup>). (c) Raw CPM data corresponding to the m<sup>1</sup>A58 introduction by Trm6/Trm61 on the tRNA<sup>Phe</sup> containing the Ψ55 modification (Ψ55-tRNA<sup>Phe</sup>). (d) Raw CPM data corresponding to the m<sup>1</sup>A58 introduction by Trm6/Trm61 on the tRNA<sup>Phe</sup> containing both the Ψ55 and T54 modifications (Ψ55-T54-tRNA<sup>Phe</sup>). (e) Raw CPM data corresponding to the m<sup>1</sup>A58 introduction by Trm6/Trm61 on the unmodified-tRNA<sub>i</sub><sup>Met</sup>. (f) Raw CPM data corresponding to the m<sup>1</sup>A58 introduction by Trm6/Trm61 on the tRNA<sub>i</sub><sup>Met</sup> containing the m<sup>5</sup>C48,49 modifications (m<sup>5</sup>C-tRNA<sub>i</sub><sup>Met</sup>). CPM are measured for 4 or 5 time points in at least three independent experiments (N=3 or 4). Black dots represent individual measurements.

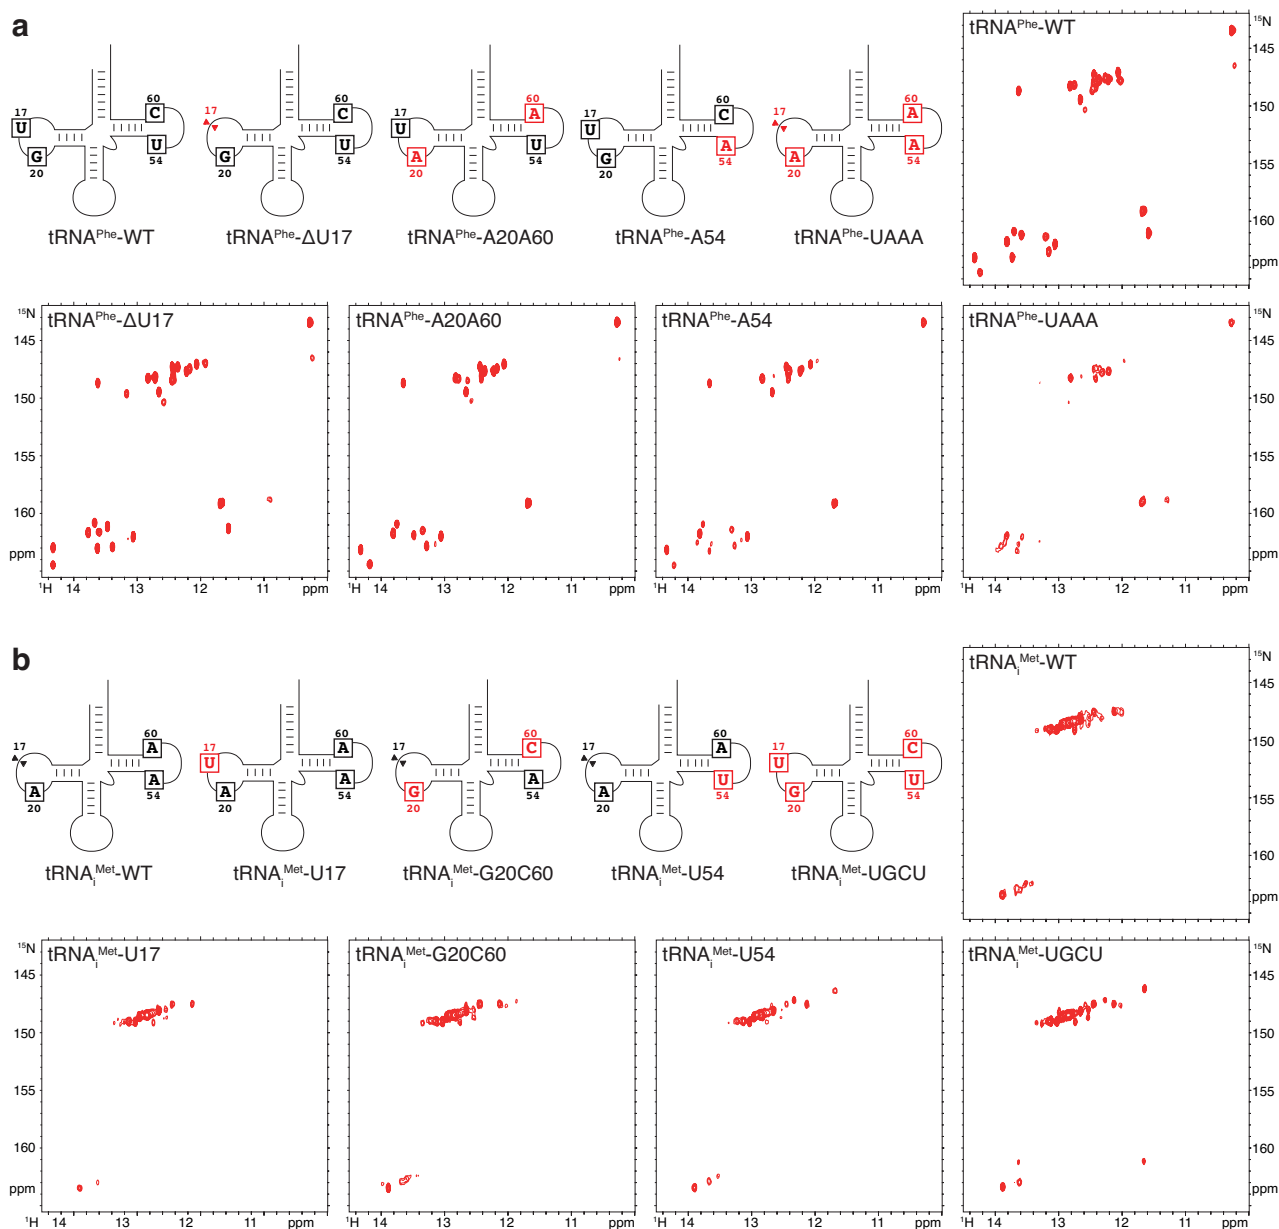

**Supplementary Figure S6: Effect of nucleotide mutations on the structural properties of yeast tRNA<sup>Phe</sup> and yeast tRNA<sub>i</sub><sup>Met</sup>.**

(a) (*top left*) Schematic cloverleaf representation of yeast elongator tRNA<sup>Phe</sup> showing residues (boxed) characteristic of elongator tRNAs. Residues in black represent nucleotides that correspond to the WT sequence. Residues in red represent mutated nucleotides that correspond to the initiator tRNA<sub>i</sub><sup>Met</sup> sequence. The triangles in the D-loop denote that the U17 is absent. (*bottom right*) Imino (<sup>1</sup>H,<sup>15</sup>N) correlation spectra of <sup>15</sup>N-labelled tRNA<sup>Phe</sup> WT and variants measured at 38°C in the NMR buffer.

(b) (*top left*) Schematic cloverleaf representation of yeast initiator tRNA<sub>i</sub><sup>Met</sup> showing residues (boxed) characteristic of initiator tRNA. Residues in black represent nucleotides that correspond to the WT sequence. Residues in red represent mutated nucleotides that correspond to the elongator tRNA<sup>Phe</sup> sequence. The triangles in the D-loop denote that the U17 is absent. (*bottom right*) Imino (<sup>1</sup>H,<sup>15</sup>N) correlation spectra of <sup>15</sup>N-labelled tRNA<sub>i</sub><sup>Met</sup> WT and variants measured at 38°C in the NMR buffer.

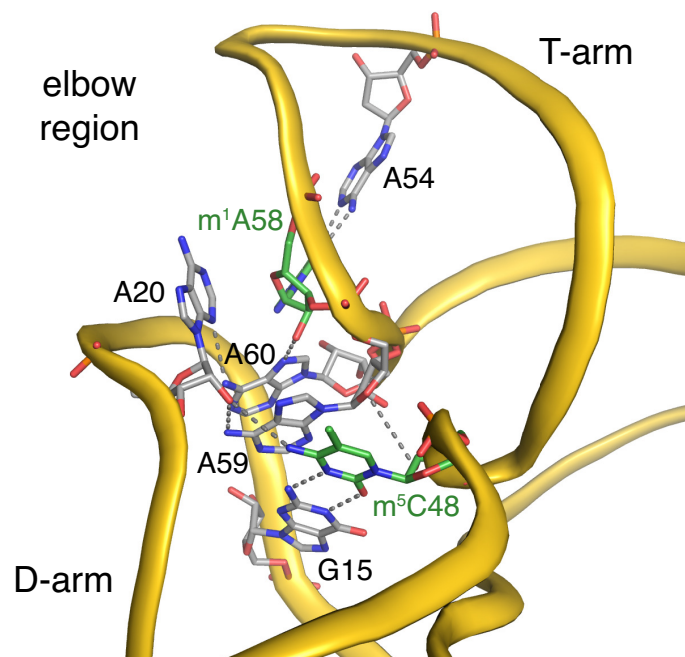

**Supplementary Figure S7: Close-up view of the intricate network of interaction at the level of the elbow region of initiator tRNA<sub>i</sub><sup>Met</sup>**

Close-up view of yeast tRNA<sub>i</sub><sup>Met</sup> illustrating the proximity between nucleotides m<sup>5</sup>C48 and m<sup>1</sup>A58. The intricate network of interactions between nucleotides G15, m<sup>5</sup>C48, A20, A59, A60, and m<sup>1</sup>A58 is shown with potential hydrogen bonds as grey dashes. tRNA backbone is shown as a cartoon in yellow. Modified nucleotides m<sup>5</sup>C48 and m<sup>1</sup>A58 are shown in green.

## SUPPLEMENTARY REFERENCES

- (1) Heinemeyer W, Kleinschmidt JA, Saidowsky J, Escher C, Wolf DH. Proteinase yscE, the yeast proteasome/multicatalytic-multifunctional proteinase: mutants unravel its function in stress induced proteolysis and uncover its necessity for cell survival. *EMBO J* (1991) 10:555-562.
- (2) Barraud P, Gato A, Heiss M, Catala M, Kellner S, Tisné C. Time-resolved NMR monitoring of tRNA maturation. *Nat Commun* (2019) 10:3373.
- (3) Baba T, Ara T, Hasegawa M, et al. Construction of Escherichia coli K-12 in-frame, single-gene knockout mutants: the Keio collection. *Mol Syst Biol* (2006) 2:2006.0008.
- (4) Becker HF, Motorin Y, Planta RJ, Grosjean H. The yeast gene YNL292w encodes a pseudouridine synthase (Pus4) catalyzing the formation of psi55 in both mitochondrial and cytoplasmic tRNAs. *Nucleic Acids Res* (1997) 25:4493-99.
- (5) Motorin Y, Grosjean H. Multisite-specific tRNA:m5C-methyltransferase (Trm4) in yeast *Saccharomyces cerevisiae*: identification of the gene and substrate specificity of the enzyme. *RNA* (1999) 5:1105-18.
